# Supplementary material
Source: bioRxiv or medRxiv preprint supplement (https://medrxiv.org/content/medrxiv/early/2021/09/27/2021.09.21.21263849/DC2/embed/media-2.pdf)
Supplement: Supplementary file [file media-2.pdf]

## Appendix 2. List of reviews used to build the sample

| Review               | Search date | COVID-19 L-OVE detection date | Nº of included studies |
|----------------------|-------------|-------------------------------|------------------------|
| Abdelrahman Z [1]    | 2020-09-06  | 2021-04-02                    | 136                    |
| Akbar M [2]          | 2020-12-09  | 2021-04-16                    | 14                     |
| Alkhatip A [3]       | 2020-07-28  | 2021-04-13                    | 33                     |
| Alzahrani S [4]      | 2020-04-11  | 2021-04-07                    | 9                      |
| Axfors C [5]         | 2020-10-16  | 2021-04-16                    | 31                     |
| Baral R [6]          | 2020-09-01  | 2021-04-01                    | 52                     |
| Barboza J [7]        | 2020-08-22  | 2021-04-11                    | 41                     |
| Bareille M [8]       | 2020-12-31  | 2021-04-30                    | 44                     |
| Barreira D [9]       | 2020-11-26  | 2021-04-24                    | 11                     |
| Bartoszko J [10]     | 2021-03-25  | 2021-04-28                    | 11                     |
| Calzetta L [11]      | 2021-02-08  | 2021-04-30                    | 4                      |
| Chong W [12]         | 2021-03-20  | 2021-04-24                    | 19                     |
| Chowdhury A [13]     | 2020-10-21  | 2021-04-21                    | 12                     |
| Dhouib W [14]        | 2020-12-01  | 2021-04-10                    | 42                     |
| Dmytriw A [15]       | 2021-03-01  | 2021-04-23                    | 10                     |
| Drame M [16]         | 2021-03-15  | 2021-04-30                    | 11                     |
| Dy L [17]            | 2020-09-30  | 2021-04-21                    | 20                     |
| Elsayed H [18]       | 2020-05-28  | 2021-04-30                    | 12                     |
| Flook M [19]         | 2020-04-29  | 2021-04-14                    | 32                     |
| Fontelo P [20]       | 2020-07-08  | 2021-04-06                    | 19                     |
| Garcia-Zamora S [21] | 2020-08-30  | 2021-04-24                    | 30                     |
| Gaurav M [22]        | 2020-04-08  | 2021-04-30                    | 30                     |
| Gianfredi V [23]     | 2021-04-01  | 2021-04-30                    | 15                     |
| Gisoni P [24]        | 2021-01-21  | 2021-04-07                    | 87                     |
| Gonçalves N [25]     | 2020-07-21  | 2021-04-23                    | 69                     |
| Hariyanto T [26]     | 2020-11-29  | 2021-04-07                    | 10                     |
| Henrina J [27]       | 2020-11-23  | 2021-04-01                    | 44                     |
| Hoang T [28]         | 2020-09-19  | 2021-04-07                    | 40                     |
| Jafari Z [29]        | 2021-01-28  | 2021-04-13                    | 12                     |
| Jewbali L [30]       | 2020-06-09  | 2021-04-17                    | 8                      |

|                           |            |            |    |
|---------------------------|------------|------------|----|
| Johnson H [31]            | 2020-07-01 | 2021-04-06 | 22 |
| Kow C [32]                | 2021-04-05 | 2021-04-22 | 5  |
| Lee J [33]                | 2021-01-28 | 2021-04-30 | 17 |
| Lee K [34]                | 2020-10-26 | 2021-04-07 | 83 |
| Lee T [35]                | 2020-11-17 | 2021-04-13 | 30 |
| Lippi G [36]              | 2021-02-18 | 2021-04-25 | 18 |
| Mbwogge M [37]            | 2020-12-22 | 2021-04-16 | 35 |
| Menon T [38]              | 2020-11-28 | 2021-04-22 | 19 |
| Mirbeyk M [39]            | 2020-04-28 | 2021-04-07 | 37 |
| Mitaka H [40]             | 2021-04-04 | 2021-04-27 | 28 |
| Mogensen M [41]           | 2020-10-31 | 2021-04-30 | 39 |
| Mondal R [42]             | 2020-09-10 | 2021-04-13 | 21 |
| Mondello C [43]           | 2020-08-31 | 2021-04-20 | 63 |
| Mostafa M [44]            | 2021-04-21 | 2021-04-11 | 24 |
| Muller A [45]             | 2020-09-25 | 2021-04-25 | 18 |
| Ouyang L [46]             | 2020-07-02 | 2021-04-27 | 40 |
| Oyelade T [47]            | 2020-04-10 | 2021-04-01 | 21 |
| Palaiodimou L [48]        | 2020-12-18 | 2021-04-11 | 18 |
| Parisi R [49]             | 2021-01-08 | 2021-04-15 | 29 |
| Pecoraro V [50]           | 2021-02-28 | 2021-04-20 | 32 |
| Pizarro-Pennarolli C [51] | 2020-09-10 | 2021-04-20 | 9  |
| Pranata R [52]            | 2020-12-07 | 2021-04-30 | 5  |
| Qi K [53]                 | 2020-12-14 | 2021-04-14 | 37 |
| Qiu R [54]                | 2021-02-28 | 2021-04-22 | 33 |
| Rakhmat I [55]            | 2021-03-07 | 2021-04-11 | 9  |
| Ramanathan K [56]         | 2021-01-10 | 2021-04-06 | 22 |
| RedARETS [57]             | 2021-02-02 | 2021-04-06 | 5  |
| Regmi K [58]              | 2021-03-12 | 2021-04-30 | 33 |
| Rezaei S [59]             | 2020-12-26 | 2021-04-09 | 73 |
| Ribeiro GE [60]           | 2020-07-28 | 2021-04-17 | 2  |
| Saha S [61]               | 2020-06-30 | 2021-04-07 | 22 |
| Salman M [62]             | 2020-08-24 | 2021-04-20 | 14 |
| Sanjay R [63]             | 2021-02-14 | 2021-04-26 | 39 |

|                     |            |            |     |
|---------------------|------------|------------|-----|
| Saragih I [64]      | 2020-11-29 | 2021-04-09 | 15  |
| Sathian B [65]      | 2020-12-31 | 2021-04-16 | 14  |
| Sheikh A [66]       | 2020-09-15 | 2021-04-27 | 64  |
| Shubham M [67]      | 2020-12-15 | 2021-04-24 | 350 |
| Singh A [68]        | 2020-11-28 | 2021-04-17 | 14  |
| Sohrabizadeh S [69] | 2020-09-28 | 2021-04-14 | 13  |
| Souza L [70]        | 2020-05-22 | 2021-04-23 | 10  |
| Thakur B [71]       | 2020-07-24 | 2021-04-22 | 118 |
| Tieleman R [72]     | 2020-07-17 | 2021-04-17 | 8   |
| Toubasi A [73]      | 2020-11-21 | 2021-04-07 | 6   |
| Varghese A [74]     | 2020-10-05 | 2021-04-23 | 26  |
| Wang J [75]         | 2021-01-01 | 2021-04-22 | 52  |
| Yassin A [76]       | 2020-04-22 | 2021-04-01 | 44  |
| Yu J [77]           | 2020-08-04 | 2021-04-27 | 16  |
| Zangiabadian M [78] | 2020-07-30 | 2021-04-07 | 12  |
| Zhang L [79]        | 2020-09-29 | 2021-04-07 | 34  |
| Zhang Y [80]        | 2020-06-01 | 2021-04-10 | 35  |
| Zhao Y [81]         | 2020-11-30 | 2021-04-02 | 12  |
| Zuin M [82]         | 2021-01-31 | 2021-04-16 | 12  |
| Zuin M (2) [83]     | 2021-01-31 | 2021-04-07 | 18  |

## References

1. Abdelrahman Z, Liu Q, Jiang S, Li M, Sun Q, Zhang Y, Wang X. Evaluation of the Current Therapeutic Approaches for COVID-19: A Systematic Review and a Meta-analysis. *Frontiers in pharmacology*. 2021;12:607408.
2. Akbar MR, Wibowo A, Pranata R, Setiabudiawan B. Low Serum 25-hydroxyvitamin D (Vitamin D) Level Is Associated With Susceptibility to COVID-19, Severity, and Mortality: A Systematic Review and Meta-Analysis. *Frontiers in nutrition*. 2021;8:660420.
3. Alkhatip AAAMM, Kamel MG, Hamza MK, Farag EM, Yassin HM, Elayashy M, Naguib AA, Wagih M, Abd-Elhay FA, Algameel HZ, Yousef MA, Purcell A, Helmy M. The Diagnostic and Prognostic Role of Neutrophil-to-Lymphocyte Ratio in COVID-19: A Systematic Review and Meta-Analysis. *Expert review of molecular diagnostics*. 2021;

4. Alzahrani SH, Al-Rabia MW. Cardiac Injury Biomarkers and the Risk of Death in Patients with COVID-19: A Systematic Review and Meta-Analysis. *Cardiology research and practice*. 2021;2021:9363569.
5. Axfors, Cathrine, Schmitt, Andreas M., Janiaud, Perrine et al. Mortality outcomes with hydroxychloroquine and chloroquine in COVID-19 from an international collaborative meta-analysis of randomized trials. *Nature Communications*. 2021;12(1):2349.
6. Baral R, Tsampasian V, Debski M, Moran B, Garg P, Clark A, Vassiliou VS. Association Between Renin-Angiotensin-Aldosterone System Inhibitors and Clinical Outcomes in Patients With COVID-19: A Systematic Review and Meta-analysis. *JAMA network open*. 2021;4(3):e213594.
7. Barboza JJ, Chambergo-Michilot D, Velasquez-Sotomayor M, Silva-Rengifo C, Diaz-Arocutipa C, Caballero-Alvarado J, Garcia-Solorzano FO, Alarcon-Ruiz CA, Albitres-Flores L, Malaga G, Schlagenhauf P, Rodriguez-Morales AJ. Assessment and management of asymptomatic COVID-19 infection: A Systematic Review. *Travel medicine and infectious disease*. 2021;41:102058.
8. Bareille M., Mullier F., Hardy M., Douxfils J., Douxfils J., Roullet S., Roullet S., Lasne D., Levy J.H., Stepanian A., Susen S., Frere C., Lecompte T.. Viscoelastometric testing to assess hemostasis of covid-19: A systematic review. *Journal of Clinical Medicine*. 2021;10(8).
9. Barreira DF, Lourenço RA, Calisto R, Moreira-Gonçalves D, Santos LL, Videira PA. Assessment of the Safety and Therapeutic Benefits of Convalescent Plasma in COVID-19 Treatment: A Systematic Review and Meta-Analysis. *Frontiers in medicine*. 2021;8:660688.
10. Bartoszko JJ, Siemieniuk RAC, Kum E, Qasim A, Zeraatkar D, Ge L, Han MA, Sadeghirad B, Agarwal A, Agoritsas T, Chu DK, Couban R, Darzi AJ, Devji T, Ghadimi M, Honarmand K, Izcovich A, Khamis A, Lamontagne F, Loeb M et al. Prophylaxis against covid-19: living systematic review and network meta-analysis. *BMJ (Clinical research ed.)*. 2021;373:n949.
11. Calzetta L., Ritondo B.L., Coppola A., Rogliani P., Matera M.G., Di Daniele T.. Factors influencing the efficacy of COVID-19 vaccines: A quantitative synthesis of phase III trials. *Vaccines*. 2021;9(4).
12. Chong WH, Neu KP. The Incidence, Diagnosis, and Outcomes of COVID-19-associated Pulmonary Aspergillosis (CAPA): A Systematic Review. *The Journal of hospital infection*. 2021;113:115-129.
13. Chowdhury AI, Alam MR, Rabbi MF, Rahman T, Reza S. Does higher Body Mass Index increase COVID-19 severity?: a systematic review and meta-analysis. *Obesity medicine*. 2021;23:100340.
14. Dhouib W, Maatoug J, Ayouni I, Zammit N, Ghammem R, Fredj SB, Ghannem H. The incubation period during the pandemic of COVID-19: a systematic review and meta-analysis. *Systematic reviews*. 2021;10(1):101.
15. Dmytriw AA, Chibbar R, Chen PPY, Traynor MD, Kim DW, Bruno FP, Cheung CC, Pareek A, Chou ACC et al. Outcomes of acute respiratory distress syndrome in COVID-19 patients compared to the general population: A systematic review and meta-analysis. *Expert review of respiratory medicine*. 2021;
16. Drame M., Drame M., Cofais C., Hentzien M., Proye E., Coulibaly P.S., Demoustier-Tampere D., Destailleur M.-H., Lotin M., Cantegrit E., Cebille A., Desprez A., Blondiau F., Godaert L., Kanagaratnam L.. Relation between vitamin d and covid-19 in aged people: A systematic review. *Nutrients*. 2021;13(4).

17. Dy LF, Lintao RCV, Cordero CP, Cabaluna ITG, Dans LF. Prevalence and prognostic associations of cardiac abnormalities among hospitalized patients with COVID-19: a systematic review and meta-analysis. *Scientific reports*. 2021;11(1):8449.
18. Elsayed H.H., Hassaballa A.S., Ahmed T.A., Sharkawy H.Y., Gumaa M.. Extracorporeal membrane oxygenation (ECMO) in patients with severe COVID-19 adult respiratory distress syndrome: a systematic review and meta-analysis. *The Cardiothoracic Surgeon*. 2021;29(1).
19. Flook M, Jackson C, Vasileiou E, Simpson CR, Muckian MD, Agrawal U, McCowan C, Jia Y, Murray JLK, Ritchie LD, Robertson C, Stock SJ, Wang X, Woolhouse MEJ, Sheikh A, Stagg HR. Informing the public health response to COVID-19: a systematic review of risk factors for disease, severity, and mortality. *BMC infectious diseases*. 2021;21(1):342.
20. Fontelo P, Bastola M, Zheng Z, Baik S. A Review of Thromboembolic Events in Hospitalized COVID-19 Patients. *ResearchSquare*. 2021;
21. Garcia-Zamora S, Lee S, Haseeb S, Bazoukis G, Tse G, Alvarez-Garcia J, Gul EE, Āñinier G, Alexander B, Pinto-Filho MM, Liu T, Baranchuk A, International Society of Electrophysiology Young Community (ISE-YC). Arrhythmias and Electrocardiographic findings in Coronavirus disease 2019: a systematic review and meta-analysis. *Pacing and clinical electrophysiology : PACE*. 2021;44(6):1062-1074.
22. Gaurav M., Abhilasha D., Khatib M.N., Zahiruddin Q.S.. Spectrum of initial computed tomography findings in rt-pcr positive patients with novel coronavirus 2019 disease – a systematic review of 2327 cases. *Open Public Health J.* 2021;14:118-127.
23. Gianfredi V., Mauer N.S., Signorelli C., Gianfredi V., Gentile L., Odone A., Gentile L., Ricco M.. Covid-19 and recreational skiing: Results of a rapid systematic review and possible preventive measures. *Int. J. Environ. Res. Public Health*. 2021;18(8).
24. Gisondi P, Di Leo S, Bellinato F, Cazzaniga S, Piaserico S, Naldi L. Time of Onset of Selected Skin Lesions Associated with COVID-19: A Systematic Review. *Dermatology and therapy*. 2021;
25. Gonçalves N, Mata E, Capela C, Teixeira P. The Development or Exacerbation of an Autoimmune Disorder Associated with SARS-CoV-2 infection: a Systematic Review of Case Reports. *ResearchSquare*. 2021;
26. Hariyanto TI, Kurniawan A. Dipeptidyl peptidase 4 (DPP4) inhibitor and outcome from coronavirus disease 2019 (COVID-19) in diabetic patients: a systematic review, meta-analysis, and meta-regression. *Journal of diabetes and metabolic disorders*. 2021;:1-8.
27. Joshua Henrina, Iwan Cahyo Santosa Putra, Irvan Cahyadi, Sherly Lawrensia, Hoo Felicia Hadi Gunawan, Alius Cahyadi, Jennifer Franke, Leonardo Paskah Suciadi. Clinical Characteristics and Outcomes of Venous Thromboembolism in Patients Hospitalized for COVID-19: Systematic Review and Meta-Analysis. *Thrombosis Update*. 2021;2.
28. Hoang T. Characteristics of COVID-19 Recurrence: A Systematic Review and Meta-Analysis. *Annals of global health*. 2021;87(1):28.
29. Jafari Z, Kolb BE, Mohajerani MH. Hearing Loss, Tinnitus, and Dizziness in COVID-19: A Systematic Review and Meta-Analysis. *The Canadian journal of neurological sciences. Le journal canadien des sciences neurologiques*. 2021;:1-33.

30. Jewbali LSD, Hoogervorst-Schilp J, Belfroid E, Jansen CW, Asselbergs FW, Siebelink HJ. Impact of cardiovascular disease and cardiovascular risk factors in hospitalised COVID-19 patients. *Netherlands heart journal : monthly journal of the Netherlands Society of Cardiology and the Netherlands Heart Foundation*. 2021;29:13-19.
31. Johnson H, Garg M, Shantikumar S, Thachil J, Rai B, Aboumarzouk OM, Hashim H, Philip J. COVID-19 (SARS-CoV-2) in Non-Airborne body fluids: A systematic review & Meta-analysis. *Turkish journal of urology*. 2021;47(2):87-97.
32. Kow CS, Hasan SS. The risk of mortality in patients with COVID-19 with pre-diagnosis use of NSAIDs: a meta-analysis. *Inflammopharmacology*. 2021;
33. Lee J, Song JU. Diagnostic accuracy of the Cepheid Xpert Xpress and the Abbott ID NOW assay for rapid detection of SARS-CoV-2: A systematic review and meta-analysis. *Journal of medical virology*. 2021;93(7):4523-4531.
34. Lee KW, Yap SF, Ngeow YF, Lye MS. COVID-19 in People Living with HIV: A Systematic Review and Meta-Analysis. *International journal of environmental research and public health*. 2021;18(7).
35. Lee T, Cau A, Cheng MP, Levin A, Lee TC, Vinh DC, Lamontagne F, Singer J, Walley KR, Murthy S, et al. Angiotensin receptor blockers and angiotensin converting enzyme inhibitors in covid-19 -meta-analysis/meta-regression adjusted for confounding factors. *CJC open*. 2021;
36. Lippi G, Henry BM, Favalaro EJ. Mean Platelet Volume Predicts Severe COVID-19 Illness. *Seminars in thrombosis and hemostasis*. 2021;47(4):456-459.
37. Mbwogge M. Mass Testing With Contact Tracing Compared to Test and Trace for the Effective Suppression of COVID-19 in the United Kingdom: Systematic Review. *JMIRx med*. 2021;2(2):e27254.
38. Menon T, Sharma R, Kataria S, Sardar S, Adhikari R, Tousif S, Khan H, Rathore SS, Singh R, Ahmed Z. The Association of Acute Kidney Injury With Disease Severity and Mortality in COVID-19: A Systematic Review and Meta-Analysis. *Cureus*. 2021;13(3):e13894.
39. Mirbeyk M, Saghadzadeh A, Rezaei N. A systematic review of pregnant women with COVID-19 and their neonates. *Archives of gynecology and obstetrics*. 2021;
40. Mitaka H, Kuno T, Takagi H, Patrawalla P. Incidence and Mortality of COVID-19-associated Pulmonary Aspergillosis: A Systematic Review and Meta-analysis. *Mycoses*. 2021;
41. Mogensen MA, Wangaryattawanich P, Hartman J, Filippi CG, Hippe DS, Cross NM. Special report of the RSNA COVID-19 task force: systematic review of outcomes associated with COVID-19 neuroimaging findings in hospitalized patients. *The British journal of radiology*. 2021;:20210149.
42. Mondal R, Deb S, Shome G, Ganguly U, Lahiri D, Benito-Leñ J. COVID-19 and emerging spinal cord complications: A systematic review. *Multiple sclerosis and related disorders*. 2021;51:102917.
43. Mondello C, Rocuzzo S, Malfa O, Sapienza D, Gualniera P, Ventura Spagnolo E, Di Nunno N, Salerno M, Pomara C, Asmundo A. Pathological Findings in COVID-19 as a Tool to Define SARS-CoV-2 Pathogenesis. A Systematic Review. *Frontiers in pharmacology*. 2021;12:614586.
44. Mostafa Mohammadi, Alireza Khafae Pour Khamseh, Hesam Aldin Varpaei. Invasive airway "Intubation" in COVID-19 patients: statistics, causes and recommendations. *medRxiv*. 2021;

45. Muller AE, Himmels JPW, Van de Velde S. Instruments to measure fear of COVID-19: a diagnostic systematic review. *BMC medical research methodology*. 2021;21(1):82.
46. Ouyang L, Yu M, Zhu Y, Gong J. Respiratory supports of COVID-19 patients in intensive care unit: A systematic review. *Heliyon*. 2021;7(4):e06813.
47. Oyelade T, Alqahtani J, Canciani G. Prognosis of COVID-19 in Patients with Liver and Kidney Diseases: An Early Systematic Review and Meta-Analysis. 2020. 80. doi: 10.3390/tropicalmed5020080.
48. Palaiodimou L, Stefanou MI, Katsanos AH, Fragkou PC, Papadopoulou M, Moschovos C, Michopoulos I, Kokotis P, Bakirtzis C, Naska A, Vassilakopoulos TI, Chroni E, Tsiodras S, Tsivgoulis G. Prevalence, clinical characteristics and outcomes of Guillain-Barré syndrome spectrum associated with COVID-19: a systematic review and meta-analysis. *European journal of neurology*. 2021;
49. Parisi R, Costanzo S, Di Castelnuovo A, de Gaetano G, Donati MB, Iacoviello L. Different Anticoagulant Regimens, Mortality, and Bleeding in Hospitalized Patients with COVID-19: A Systematic Review and an Updated Meta-Analysis. *Seminars in thrombosis and hemostasis*. 2021;
50. Valentina Pecoraro, Antonella Negro, Tommaso Pirotti, Tommaso Trenti. Estimate False-Negative RT-PCR Rates for SARS-CoV-2: A Systematic Review and Meta-Analysis. SSRN. 2021;
51. Pizarro-Pennarolli C, Sánchez-Rojas C, Torres-Castro R, Vera-Uribe R, Sanchez-Ramirez DC, Vasconcello-Castillo L, Solís-Navarro L, Rivera-Lillo G. Assessment of activities of daily living in patients post COVID-19: a systematic review. *PeerJ*. 2021;9:e11026.
52. Pranata R., Lim M.A., Huang I., Vania R., Lukito A.A., Huang I., Yonas E., Henrina J., Vania R., Lukito A.A., Nasution S.A., Alwi I., Siswanto B.B.. Visceral adiposity, subcutaneous adiposity, and severe coronavirus disease-2019 (COVID-19): Systematic review and meta-analysis. *Clin. Nutr. ESPEN*. 2021;43:163-168.
53. Qi K, Zeng W, Ye M, Zheng L, Song C, Hu S, Duan C, Wei Y, Peng J, Zhang W, Xu J. Clinical, laboratory, and imaging features of pediatric COVID-19: A systematic review and meta-analysis. *Medicine*. 2021;100(15):e25230.
54. Qiu R, Li J, Xiao Y, Gao Z, Weng Y, Zhang Q, Wang C, Gong H, Li W. The therapeutic effect and safety of the drugs for COVID-19: A systematic review and meta-analysis. *Medicine*. 2021;100(16):e25532.
55. Rakhmat II, Kusmala YY, Handayani DR, Juliastuti H, Nawangsih EN, Wibowo A, Lim MA, Pranata R. Dipeptidyl peptidase-4 (DPP-4) inhibitor and mortality in coronavirus disease 2019 (COVID-19) - A systematic review, meta-analysis, and meta-regression. *Diabetes & metabolic syndrome*. 2021;15(3):777-782.
56. Ramanathan K, Shekar K, Ling R, Barbaro R, Wong S, Tan C, Rochweg B, Fernando S, Takeda S, MacLaren G, Fan E, Brodie D. Extracorporeal Membrane Oxygenation for COVID-19: A Systematic Review and Meta-Analysis. *ResearchSquare*. 2021;
57. Red Argentina Pública de Evaluación de Tecnologías Sanitarias. S.I (RedARETS). Use of convalescent plasma for the treatment of patients with early coronavirus disease (COVID-19). *Red*

Argentina P blica de Evaluaci3n de Tecnolog as Sanitarias. s.l.; RedARETS; feb.-mar. 2021.. 2021;

58. Regmi K., Regmi K., Lwin C.M.. Factors associated with the implementation of non-pharmaceutical interventions for reducing coronavirus disease 2019 (Covid-19): A systematic review. *Int. J. Environ. Res. Public Health*. 2021;18(8).
59. Rezaei S, Fatemi B, Karimi Majd Z, Minaei H, Peikanpour M, Anjidani N, Taheri A, Dastan F, Mosaed R. Efficacy and safety of Tocilizumab in severe and critical COVID-19: A Systematic Review and Meta-Analysis. *Expert review of clinical immunology*. 2021;:1-13.
60. Ribeiro, Georgea Espindola, Silva, Daniela Polo Camargo da. Audiological implications of COVID-19: an integrative literature review. *Rev. CEFAC*. 2021;23(1):e9620-e9620.
61. Saha S, Al-Rifai RH, Saha S. Diabetes prevalence and mortality in COVID-19 patients: a systematic review, meta-analysis, and meta-regression. *Journal of diabetes and metabolic disorders*. 2021;:1-12.
62. Salman M, Mallah S, Khalid W, Moran L, Abousedu Y, Jassim G. Characteristics of Patients with SARS-CoV-2 Positive Cerebrospinal Fluid: A Systematic Review. *ResearchSquare*. 2021;
63. Sanjay Rao, Tarek Benzouak, Sasha Gunpat, Rachel J Burns, Tayyeb A Tahir, Stephen Jolles, Steve Kisely. Fatigue symptoms associated with COVID-19 in convalescent or recovered COVID-19 patients; a systematic review and meta-analysis. *medRxiv*. 2021;
64. Saragih ID, Saragih IS, Batubara SO, Lin CJ. Dementia as a mortality predictor among older adults with COVID-19: A systematic review and meta-analysis of observational study. *Geriatric nursing (New York, N.Y.)*. 2021;
65. Sathian B., Al Hamad H., Asim M., Mancha M.A., Mekkodathil A.A., Banerjee I., Roy B., Pizarro A.B., et al. Development and implementation of a potential coronavirus disease 2019 (COVID-19) vaccine: A systematic review and meta-analysis of vaccine clinical trials. *Nepal J. Epidemiol.*. 2021;11(1):959-982.
66. Sheikh AB, Chourasia PK, Javed N, Chourasia MK, Suriya SS, Upadhyay S, Ijaz F, Pal S, Moghimi N, Shekhar R. Association of Guillain-Barre syndrome with COVID-19 infection: An updated systematic review. *Journal of neuroimmunology*. 2021;355:577577.
67. Shubham Misra, Kavitha Kolappa, Manya Prasad, Divya Radhakrishnan, Kiran T Thakur, Tom Solomon, Benedict Daniel Michael, Andrea Sylvia Winkler, Ettore Beghi, Alla Guekht, Carlos A A Pardo, Greta Karen Wood, Sherry Hsiang-Yi Chou, Ericka L Fink, Erich Schmutzhard, Amir Kheradmand, Fan Kee Hoo, Amit Kumar, Animesh Das, Achal K Srivastava, Ayush Agarwal, Tarun Dua, Kameshwar Prasad. Frequency of neurological manifestations in COVID-19: a systematic review and meta-analysis of 350 studies. *medRxiv*. 2021;
68. Singh A, Hussain S, Antony B. Non-alcoholic fatty liver disease and clinical outcomes in patients with COVID-19: A comprehensive systematic review and meta-analysis. *Diabetes & metabolic syndrome*. 2021;15(3):813-822.
69. Sohrabizadeh S, Yousefian S, Bahramzadeh A, Vaziri MH. A systematic review of health sector responses to the coincidence of disasters and COVID-19. *BMC public health*. 2021;21(1):709.



70. Souza LFF, Paineiras-Domingos LL, Melo-Oliveira MES, Pessanha-Freitas J, Moreira-Marconi E, Lacerda ACR, Mendonça VA, Sã-Caputo DDC, Bernardo-Filho M. The impact of COVID-19 pandemic in the quality of sleep by Pittsburgh Sleep Quality Index: A systematic review. *Ciencia & saude coletiva*. 2021;26(4):1457-1466.
71. Thakur B, Dubey P, Benitez J, Torres JP, Reddy S, Shokar N, Aung K, Mukherjee D, Dwivedi AK. A systematic review and meta-analysis of geographic differences in comorbidities and associated severity and mortality among individuals with COVID-19. *Scientific reports*. 2021;11(1):8562.
72. Tieleman RG, Klok FA, Belfroid E, Hoogervorst-Schilp J, Schalkers I, Jansen CW, Siebelink HJ. Effect of anticoagulant therapy in COVID-19 patients. *Netherlands heart journal : monthly journal of the Netherlands Society of Cardiology and the Netherlands Heart Foundation*. 2021;29:35-44.
73. Toubasi AA, AbuAnzeh RB, Khraisat BR, Al-Sayegh TN, AlRyalat SA. A meta-analysis: Proton pump inhibitors current use and the risk of Coronavirus Infectious Disease 2019 development and its related mortality. *Archives of medical research*. 2021;
74. Varghese A, George G, Kondaguli SV, Naser AY, Khakha DC, Chatterji R. Decline in the mental health of nurses across the globe during COVID-19: A systematic review and meta-analysis. *Journal of global health*. 2021;11:05009.
75. Wang J, Yang W, Chen P, Guo J, Liu R, Wen P, Li K, Lu Y, Ma T, Li X, Qin S, Zhang Y, Wang Y. The proportion and effect of corticosteroid therapy in patients with COVID-19 infection: A systematic review and meta-analysis. *PloS one*. 2021;16(4):e0249481.
76. Yassin A, Nawaiseh M, Shaban A, Alsherbini K, El-Salem K, Soudah O, Abu-Rub M. Neurological manifestations and complications of coronavirus disease 2019 (COVID-19): a systematic review and meta-analysis. *BMC neurology*. 2021;21(1):138.
77. Yu JN, Wu BB, Feng LP, Chen HL. COVID-19 related pressure injuries in patients and personnel: A systematic review. *Journal of tissue viability*. 2021;
78. Zangiabadian M, Nejadghaderi SA, Zahmatkesh MM, Hajikhani B, Mirsaeidi M, Nasiri MJ. The Efficacy and Potential Mechanisms of Metformin in the Treatment of COVID-19 in the Diabetics: A Systematic Review. *Frontiers in endocrinology*. 2021;12:645194.
79. Zhang L, Hou J, Ma FZ, Li J, Xue S, Xu ZG. The common risk factors for progression and mortality in COVID-19 patients: a meta-analysis. *Archives of virology*. 2021;
80. Zhang Y, Cen M, Hu M, Du L, Hu W, Kim JJ, Dai N. Prevalence and Persistent Shedding of Fecal SARS-CoV-2 RNA in Patients With COVID-19 Infection: A Systematic Review and Meta-analysis. *Clinical and translational gastroenterology*. 2021;12(4):e00343.
81. Zhao YH, Zhao L, Yang XC, Wang P. Cardiovascular complications of SARS-CoV-2 infection (COVID-19): a systematic review and meta-analysis. *Reviews in cardiovascular medicine*. 2021;22(1):159-165.
82. Zuin M, Rigatelli G, Bilato C, Zanon F, Zuliani G, Roncon L. Pre-existing atrial fibrillation is associated with increased mortality in COVID-19 Patients. *Journal of interventional cardiac electrophysiology : an international journal of arrhythmias and pacing*. 2021;
83. Zuin M, Rigatelli G, Bilato C, Cervellati C, Zuliani G, Roncon L. Dyslipidaemia and mortality in COVID-19 patients - a meta-analysis. *QJM : monthly journal of the Association of Physicians*. 2021;
